# Supplementary material for: J-curve relationship between corrected QT interval and mortality in acute heart failure patients
Source: PubMed Central journal article supplement — Korean J Intern Med. 2020 May 8;35(6):1371–84. doi: 10.3904/kjim.2019.030 (PMC7652667; doi:10.3904/kjim.2019.030), 2020-05-08
Supplement: kjim-2019-030-suppl2.pdf [file kjim-2019-030-suppl2.pdf]

**Supplementary Table 2. Baseline characteristics of subjects according to 5-year survival (total n = 4,990)**

| Characteristic                     | Alive (n = 2,747)         | Deceased (n = 2,243)       | p value |
|------------------------------------|---------------------------|----------------------------|---------|
| <b>Demographic data</b>            |                           |                            |         |
| Age, yr                            | 63.7 ± 15.0               | 74.0 ± 12.2                | < 0.001 |
| Sex, men                           | 1,480 (53.9)              | 1,185 (52.8)               | 0.461   |
| Body mass index, kg/m <sup>2</sup> | 24.1 ± 3.9                | 22.5 ± 3.7                 | < 0.001 |
| <b>Past medical history</b>        |                           |                            |         |
| Hypertension                       | 1,474 (53.7)              | 1,495 (66.7)               | < 0.001 |
| Diabetes mellitus                  | 864 (31.5)                | 933 (41.6)                 | < 0.001 |
| Heart failure                      | 930 (33.9)                | 1,184 (52.8)               | < 0.001 |
| Ischemic heart disease             | 615 (22.4)                | 820 (36.6)                 | < 0.001 |
| Valvular heart disease             | 376 (13.7)                | 353 (15.7)                 | 0.042   |
| Chronic obstructive lung disease   | 242 (8.8)                 | 307 (13.7)                 | < 0.001 |
| Chronic kidney disease             | 232 (8.4)                 | 466 (20.8)                 | < 0.001 |
| Cerebrovascular accident           | 310 (11.3)                | 461 (20.6)                 | < 0.001 |
| <b>Social history</b>              |                           |                            |         |
| Smoking history                    |                           |                            | < 0.001 |
| Current smoker                     | 552 (37.3)                | 274 (23.1)                 |         |
| Ex-smoker                          | 472 (31.9)                | 470 (39.7)                 |         |
| Never smoker                       | 456 (30.8)                | 441 (37.2)                 |         |
| Alcohol history                    |                           |                            | < 0.001 |
| Heavy drinker                      | 233 (15.1)                | 104 (8.8)                  |         |
| Social drinker                     | 780 (52.7)                | 509 (43.0)                 |         |
| Never drinker                      | 477 (32.2)                | 572 (48.3)                 |         |
| <b>Major ECG abnormalities</b>     |                           |                            |         |
| Atrial fibrillation                | 965 (35.1)                | 804 (35.8)                 | 0.599   |
| Right bundle branch block          | 188 (6.8)                 | 172 (7.7)                  | 0.263   |
| Left bundle branch block           | 138 (5.0)                 | 131 (5.8)                  | 0.204   |
| <b>NYHA functional class</b>       |                           |                            |         |
| Stage II                           | 515 (18.7)                | 243 (10.8)                 |         |
| Stage III                          | 1,039 (37.8)              | 774 (34.5)                 |         |
| Stage IV                           | 1,193 (43.4)              | 1,226 (54.7)               |         |
| <b>Physical exam</b>               |                           |                            |         |
| SBP, mmHg                          | 132.5 ± 29.9              | 131.5 ± 31.0               | 0.255   |
| DBP, mmHg                          | 80.5 ± 19.1               | 77.3 ± 18.4                | < 0.001 |
| HR, beats per min                  | 93.5 ± 26.2               | 91.9 ± 25.1                | 0.037   |
| <b>Laboratory exam</b>             |                           |                            |         |
| Hemoglobin, mg/dL                  | 14.3 ± 1.9                | 15.1 ± 2.1                 | < 0.001 |
| Sodium, mmol/L                     | 138.3 ± 4.3               | 136.7 ± 5.2                | < 0.001 |
| Potassium, mmol/L                  | 4.3 ± 0.6                 | 4.5 ± 0.8                  | < 0.001 |
| BUN, mg/dL                         | 22.6 ± 13.8               | 30.1 ± 18.2                | < 0.001 |
| Creatinine, mg/dL                  | 1.3 ± 1.4                 | 1.7 ± 1.5                  | < 0.001 |
| BNP, pg/mL                         | 728.1 (392.7–1,341.8)     | 1,117.3 (595.6–2,289.0)    | < 0.001 |
| NT-proBNP, pg/mL                   | 3,541.0 (1,561.0–7,627.8) | 7,222.0 (3,342.3–17,506.2) | < 0.001 |

**Supplementary Table 2. Continued**

| Characteristic                                       | Alive (n = 2,747) | Deceased (n = 2,243) | p value |
|------------------------------------------------------|-------------------|----------------------|---------|
| <b>Medication at admission</b>                       |                   |                      |         |
| Beta-blockers                                        | 734 (26.7)        | 686 (30.6)           | 0.003   |
| Renin-angiotensin-system inhibitors                  | 966 (35.2)        | 924 (41.2)           | < 0.001 |
| Mineralocorticoid receptor blockers                  | 435 (15.8)        | 475 (21.2)           | < 0.001 |
| <b>Medication at discharge</b>                       |                   |                      |         |
| Beta-blockers                                        | 1,493 (54.4)      | 927 (41.3)           | < 0.001 |
| Renin-angiotensin-system inhibitors                  | 1,964 (71.5)      | 1,366 (60.9)         | < 0.001 |
| Mineralocorticoid receptor blockers                  | 1,315 (47.9)      | 938 (41.8)           | < 0.001 |
| <b>Echocardiographic findings</b>                    |                   |                      |         |
| Left ventricular end diastolic diameter, mm          | 57.8 ± 9.9        | 57.0 ± 10.3          | 0.005   |
| Ejection fraction, %                                 | 37.8 ± 15.7       | 37.7 ± 15.3          | 0.888   |
| Heart failure with reduced ejection fraction (< 50%) | 2,035 (75.9)      | 1,646 (77.3)         | 0.265   |

Values are presented as mean ± SD, number (%), or median (interquartile range).

ECG, electrocardiogram; NYHA, New York Heart association; SBP, systolic blood pressure; DBP, diastolic blood pressure; HR, heart rate; BUN, blood urea nitrogen; BNP, B-type natriuretic peptide; NT-proBNP, N-terminal proBNP.
